# Supplementary material for: A light-responsive multienzyme complex combining cascade enzymes within a peptide-based matrix
Source: Royal Society of Chemistry journal article supplement (doi:10.1039/c7ra10372g), 2018-01-01
Supplement: c7ra10372g1.pdf [file c7ra10372g1.pdf]

## Supporting Materials

### **A light-responsive multienzyme complex by combining cascade enzymes within a peptide-based matrix**

Yutong Wang,<sup>‡a</sup> Yifei Zhang,<sup>‡a</sup> Mengfan Wang,<sup>\*ab</sup> Yanan Zhao,<sup>a</sup> Wei Qi,<sup>\*abc</sup>

Rongxin Su<sup>abc</sup> and Zhimin He<sup>a</sup>

---

<sup>a</sup> State Key Laboratory of Chemical Engineering, School of Chemical Engineering and Technology, Tianjin University, Tianjin 300072, P. R. China.

E-mail: [mwang@tju.edu.cn](mailto:mwang@tju.edu.cn); [qiwei@tju.edu.cn](mailto:qiwei@tju.edu.cn).

<sup>b</sup> Tianjin Key Laboratory of Membrane Science and Desalination Technology, Tianjin300072, P. R. China.

<sup>c</sup> The Co-Innovation Centre of Chemistry and Chemical Engineering of Tianjin, Tianjin 300072, P. R. China.

<sup>‡</sup> These authors contributed equally to this work.

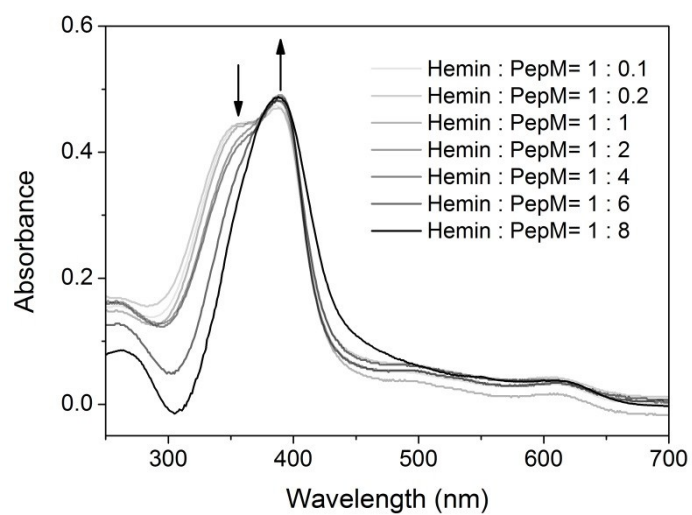

**Fig S1** Titration of hemin with different concentrations of PepM.

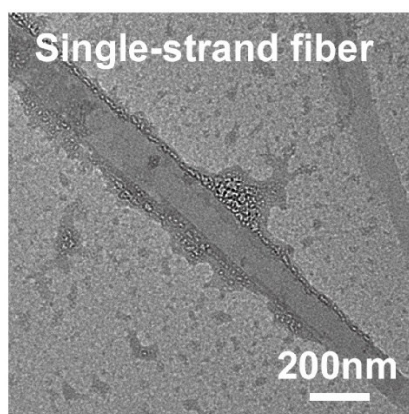

**Fig S2** The morphology of single-strand nanofiber in GOx&hemin@PepM.

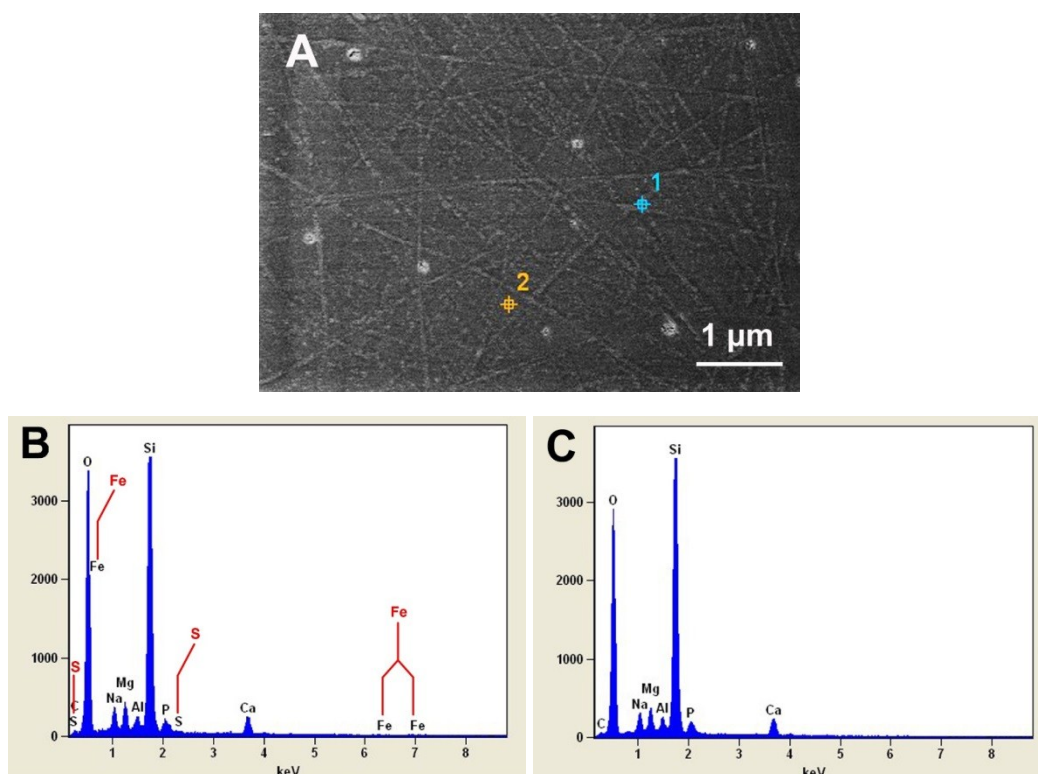

**Fig. S3** (A) Scanning area of EDX analysis. *POINT 1* is the crossing area of the GOx&hemin@PepM nanofibers. *POINT 2* is the blank space exposing the glass substrate slide. (B) EDX analysis of *POINT 1*. (C) EDX analysis of *POINT 2*.

As shown in Fig. S1, point scanning EDX analysis was used on the cross point of nanofibers (*POINT 1*) and blank area (*POINT 2*). Both areas showed high peaks at  $\sim 0.4$  keV,  $\sim 1.8$  keV and  $\sim 3.7$  keV, indicating the presence of O, Si and Ca respectively, which are rich in glass substrate slides. Compared with *POINT 2*, the characteristic Fe and S peaks can be detected at *POINT 1*, confirming the residence of GOx and hemin in this area.

For iron, there are three peaks at  $\sim 0.5$  keV and 6-7keV, corresponding to the energy excitation from different electronic shells of iron atoms. The resulting element Wt.% of iron and sulfur are approximately 0.04% and 0.06%, approximately in agreement with the initial concentration of these two elements.

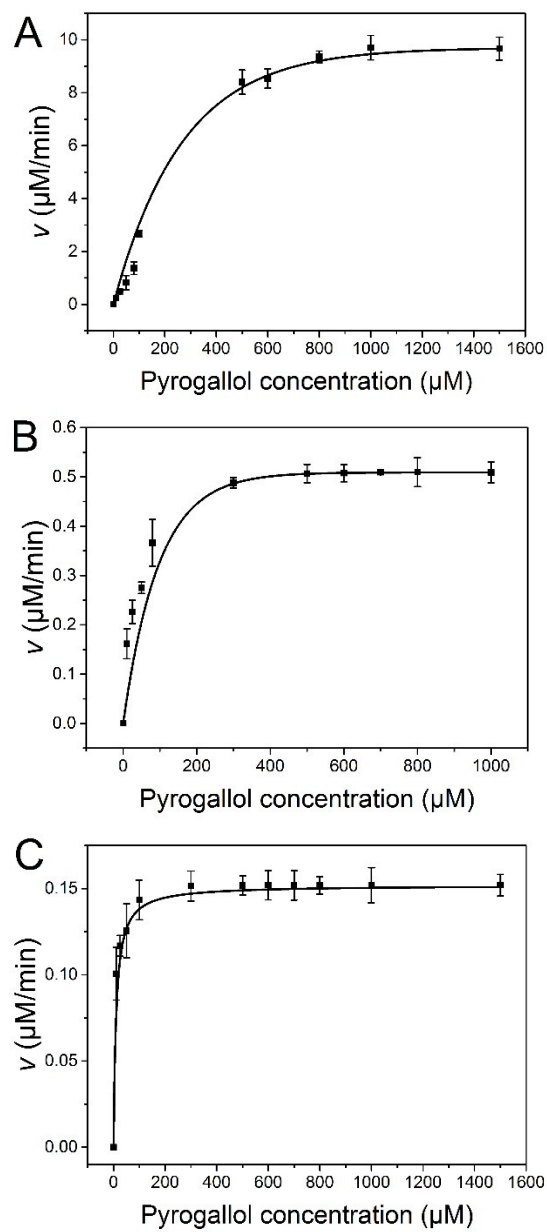

**Fig. S4** Kinetic analysis of GOx&hemin@PepM. Reaction was measured at room temperature using 150  $\mu\text{L}$  of multienzyme complex in 800  $\mu\text{L}$  PBS (50mM, pH7.4) with the fixed glucose concentration of (A) 5 mM, (B) 0.3 mM and (C) 0.03 mM.

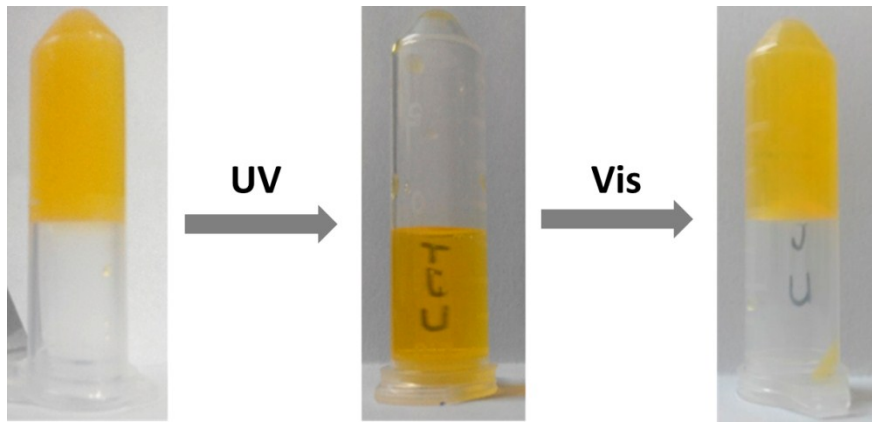

**Fig. S5** Hydrogel-solution transformation of GOx&hemin@PepM under UV and visible light irradiation.
